# Supplementary material for: Heavy Metal–Resistant Plant Growth–Promoting Citrobacter werkmanii Strain WWN1 and Enterobacter cloacae Strain JWM6 Enhance Wheat (Triticum aestivum L.) Growth by Modulating Physiological Attributes and Some Key Antioxidants Under Multi-Metal Stress
Source: Front Microbiol. 2022 May 6;13:815704. doi: 10.3389/fmicb.2022.815704 (PMC9120770; doi:10.3389/fmicb.2022.815704)
Supplement: Supplementary file 1 [file Data_Sheet_1.xlsx]

## Sheet: germination 
Control	91.667	1.66667	a		%
A	91.667	1.66667	a	0	0
B	93.333	1.66667	a	0.0181745	1.81745
AB	91.667	1.66667	a	0	0
50mg	89.333	0.666667	ab
50mg+A	93.667	1.33333	a	0.0485151	4.85151
50mg+B	90	2.88675	ab	0.00746645	0.746645
50mg+AB	93	2	a	0.0410487	4.10487
100mg	86.667	3.33333	abc
100mg+A	91.667	3.33333	a	0.0576921	5.76921
100mg+B	91.667	3.33333	a	0.0576921	5.76921
100mg+AB	91	4.58258	a	0.049996	4.9996
200mg	75.667	1.66667	c
200mg+A	86.667	1.66667	abc	0.145374	14.5374
200mg+B	83.333	3.33333	bc	0.101312	10.1312
200mg A+B	87.667	2.66667	abc	0.15859	15.859

## Sheet: root shoot lenght 
	SHOOT							ROOT
		mean	SE	letter					mean	SE	letter
	Control	48.7143	0.918443	ef	fold	percent		Control	19.2857	0.521641	ef	fold	%
	A	69.1429	1.01015	bcd	0.419355	41.9355		A	21.5714	0.782461	de	0.118519	11.8519
	B	61	0.723747	g	0.252199	25.2199		B	25.1429	1.12183	c	0.303704	30.3704
	AB	63.2857	0.924901	f	0.29912	29.912		AB	24.0714	1.04897	gh	0.248148	24.8148
	50mg	45	2.02367	g				50mg	12.8571	1.51859	h
	50mg+A	60.2857	2.95775	bc	0.339683	33.9683		50mg+A	24.2857	2.92538	cd	0.888889	88.8889
	50mg+B	60.5714	2.16967	bcd	0.346032	34.6032		50mg+B	24.4286	2.03373	cd	0.9	90
	50mg+AB	59.1429	0.737711	cde	0.314286	31.4286		50mg+AB	29	0.436436	b	1.25556	125.556
	100mg	50.2857	0.714286	f				100mg	14.4286	0.719032	gh
	100mg+A	62.5714	1.30671	ab	0.244318	24.4318		100mg+A	24.7143	0.746876	cd	0.712871	71.2871
	100mg+B	55.8571	1.24267	cde	0.110795	11.0795		100mg+B	25.8571	0.63353	bc	0.792079	79.2079
	100mg+AB	65.8571	0.911006	a	0.309659	30.9659		100mg+AB	31	1.43095	a	1.14851	114.851
	200mg	41.8571	1.56492	g				200mg	12.2857	0.714286	h
	200mg+A	50.5714	0.472005	f	0.307167	30.7167		200mg+A	17.1429	0.79966	fg	0.395349	39.5349
	200mg+B	54.7143	1.2289	def	0.424915	42.4915		200mg+B	17.7143	1.0227	f	0.44186	44.186
	200mgA+B	59.6429	1.25085	ab	0.208191	20.8191		200mgA+B	18.5714	0.685119	f	0.511628	51.1628

## Sheet: biomass
SHOOT WET							SHOOT DRY								root wet							root dry
Control	2.22857	0.135777	g				Control	0.621429	0.0309707	h					Control	0.3014	0.028067	cd				Control	0.1139	0.0112195	e
A	2.62143	0.0950295	def	0.176282	17.6282		A	0.774286	0.0182388	efg	0.245977	24.5977			A	0.31	0.020354	cd	0.0285335	2.85335		A	0.1177	0.00780328	cde	0.0333626	3.33626
B	2.5	0.102353	efg	0.121795	12.1795		B	0.691429	0.0101015	gh	0.112644	11.2644			B	0.3743	0.0307724	ab	0.241871	24.1871		B	0.1413	0.0108622	ab	0.240562	24.0562
AB	3.02571	0.193942	abc	0.357692	35.7692		AB	0.805714	0.0350413	defg	0.296552	29.6552			AB	0.3757	0.0179758	ab	0.246516	24.6516		AB	0.146	0.00631702	ab	0.281826	28.1826
50mg	1.6	0.0654654	i		0		50mg	0.515714	0.0249626	i		0			50mg	0.2757	0.0150961	d		0		50mg	0.0721	0.0111065	f		0
50mg+A	3.32857	0.295775	ab	1.08036	108.036		50mg+A	0.981429	0.0845557	a	0.903047	90.3047			50mg+A	0.3014	0.0240464	cd	0.0932173	9.32173		50mg+A	0.1147	0.00904937	de	0.590846	59.0846
50mg+B	2.95714	0.173009	bcd	0.848214	84.8214		50mg+B	0.855714	0.0590342	bcde	0.65928	65.928			50mg+B	0.35	0.0231969	bc	0.269496	26.9496		50mg+B	0.137	0.009	bcd	0.900139	90.0139
50mg+AB	3.04286	0.0996593	abc	0.901786	90.1786		50mg+AB	0.914286	0.0313853	abc	0.772853	77.2853			50mg+AB	0.4157	0.0309267	a	0.507798	50.7798		50mg+AB	0.1626	0.01049	a	1.2552	125.52
100mg	1.6	0.057735	i		0		100mg	0.467143	0.0149147	i		0			100mg	0.2029	0.00993174	e		0		100mg	0.0664	0.00408725	f		0
100mg+A	2.25714	0.0685119	fg	0.410714	41.0714		100mg+A	0.788571	0.00857143	defg	0.688073	68.8073			100mg+A	0.3671	0.00918443	ab	0.809266	80.9266		100mg+A	0.1249	0.0042056	bcde	0.881024	88.1024
100mg+B	2.42857	0.0808122	efg	0.517857	51.7857		100mg+B	0.827143	0.0176897	cde	0.770642	77.0642			100mg+B	0.3729	0.012289	ab	0.837851	83.7851		100mg+B	0.1399	0.0105095	bc	1.10693	110.693
100mg+AB	3.38571	0.118379	a	1.11607	111.607		100mg+AB	0.935714	0.0535794	ab	1.00306	100.306			100mg+AB	0.3657	0.0203373	ab	0.802366	80.2366		100mg+AB	0.1297	0.00731507	bcde	0.953313	95.3313
200mg	1.12857	0.0865043	j		0		200mg	0.32	0.0181265	j		0			200mg	0.1214	0.00737711	f		0		200mg	0.0409	0.00205204	g		0
200mg+A	1.81429	0.14708	hi	0.607595	60.7595		200mg+A	0.645714	0.0556715	h	1.01786	101.786			200mg+A	0.1957	0.0084112	e	0.612026	61.2026		200mg+A	0.0661	0.00291749	f	0.616137	61.6137
200mg+B	2.74286	0.104328	cde	1.43038	143.038		200mg+B	0.892857	0.0227527	abcd	1.79018	179.018			200mg+B	0.1857	0.00782461	e	0.529654	52.9654		200mg+B	0.0636	0.00493219	f	0.555012	55.5012
200mg	2.18571	0.0769309	gh	0.936709	93.6709		200mg	0.701429	0.0131708	fgh	1.19196	119.196			200mg	0.19	0.0173205	e	0.565074	56.5074		200mg A+B	0.0594	0.00571905	fg	0.452323	45.2323

## Sheet: chlorophyll 
	chl a							chl b
	Control	3.3687	0.0308791	gh	fold	percentage		Control	2.2197	0.0308791	e	fold	percentage
	A	3.9494	0.052514	ab	0.172381	17.2381		A	2.2669	0.052514	a	0.0212641	2.12641
	B	3.9021	0.0213793	a	0.15834	15.834		B	2.2703	0.0213793	a	0.0227959	2.27959
	AB	4.0882	0.0440019	bc	0.213584	21.3584		AB	2.2635	0.0440019	ab	0.0197324	1.97324
	50mg	3.161	0.0271079	e		0		50mg	2.0577	0.0191052	cd		0
	50mg+A	3.8686	0.00918333	c	0.223853	22.3853		50mg+A	2.2601	0.00607	ab	0.0983622	9.83622
	50mg+B	3.9189	0.0375079	bc	0.239766	23.9766		50mg+B	2.2669	0.0228316	a	0.101667	10.1667
	50mg+AB	3.9019	0.0504383	c	0.234388	23.4388		50mg+AB	2.2871	0.00607	ab	0.111484	11.1484
	100mg	2.98	0.0185256	d		0		100mg	1.9127	0.0185256	f		0
	100mg+A	3.5696	0.00607	e	0.197852	19.7852		100mg+A	2.2635	0.0228316	ab	0.183406	18.3406
	100mg+B	3.4126	0.0228316	f	0.145168	14.5168		100mg+B	2.2568	0.0124838	ab	0.179903	17.9903
	100mg+AB	3.6826	0.00607	d	0.235772	23.5772		100mg+AB	2.25	0.0279701	bc	0.176348	17.6348
	200mg	2.7687	0.0235525	i		0		200mg	1.8115	0.008925	g		0
	200mg+A	3.2435	0.0228316	gh	0.171488	17.1488		200mg+A	2.2264	0.00584278	de	0.229037	22.9037
	200mg+B	3.2023	0.0124838	h	0.156608	15.6608		200mg+B	2.2331	0.008925	de	0.232735	23.2735
	200mg +AB	3.3699	0.0279701	f	0.217142	21.7142		200mg +AB	2.25	0.00337333	bc	0.242065	24.2065

## Sheet: catalase 
	SHOOT							ROOT
	Control	3.24365	0.0855823	j	fold	percentage		Control	1.70863	0.0154385	d	fold	percentage
	A	4.7147	0.0274534	h	0.453515	45.3515		A	1.96142	0.0257586	e	0.14795	14.795
	B	4.78426	0.030877	h	0.474961	47.4961		B	2.25381	0.0307725	b	0.319073	31.9073
	AB	4.72081	0.0288269	h	0.455399	45.5399		AB	1.83503	0.0219803	de	0.073975	7.3975
	50mg	5.45178	0.0458963	e		0		50mg	1.50761	0.0463155	f		0
	50mg+A	6.84772	0.0335755	a	0.256052	25.6052		50mg+A	2.16751	0.0225589	bc	0.43771	43.771
	50mg+B	6.8198	0.0585409	a	0.250931	25.0931		50mg+B	2.06599	0.0329949	c	0.37037	37.037
	50mg+AB	6.97716	0.0221264	a	0.279795	27.9795		50mg+AB	2.63706	0.132272	a	0.749158	74.9158
	100mg	5.02284	0.0484233	g		0		100mg	1.02538	0.0264982	g		0
	100mg+A	6.56853	0.112279	b	0.307731	30.7731		100mg+A	2.1599	0.0292705	bc	1.10644	110.644
	100mg+B	6.33249	0.081811	c	0.260738	26.0738		100mg+B	2.13959	0.0232618	bc	1.08663	108.663
	100mg+AB	6.69543	0.0282628	b	0.332996	33.2996		100mg+AB	2.64721	0.0268604	a	1.58168	158.168
	200mg	4.07107	0.0932892	i		0		200mg	0.766497	0.0110632	h		0
	200mg+A	5.55584	0.0373881	e	0.364713	36.4713		200mg+A	1.60914	0.019823	f	1.09934	109.934
	200mg+B	5.28426	0.0307725	f	0.298005	29.8005		200mg+B	1.85787	0.0317005	de	1.42384	142.384
	200mg +AB	5.80457	0.0225589	d	0.42581	42.581		200mg +AB	1.92893	0.0482234	d	1.51656	151.656

## Sheet: POD 
	SHOOT							ROOT
	Control	19.812	0.497322	cd	FOLD	PERCENTAGE		Control	4.6203	0.0526316	i	FOLD	PERCENTAGE
	A	24.511	0.433555	a	0.237179	23.7179		A	9.0376	0.0827068	fg	0.956063	95.6063
	B	24.586	0.651147	a	0.240965	24.0965		B	8.7707	0.202415	fg	0.898297	89.8297
	AB	24.211	0.334143	a	0.222037	22.2037		AB	8.8647	0.0651147	fg	0.918642	91.8642
	50mg	12.132	0.454234	ef		0		50mg	8.6203	0.135547	g		0
	50mg+A	24.323	0.888841	a	1.00486	100.486		50mg+A	13.353	0.187819	a	0.549018	54.9018
	50mg+B	19.135	0.327737	d	0.577234	57.7234		50mg+B	10.214	0.0381537	bc	0.184878	18.4878
	50mg+AB	21.165	0.497322	bc	0.74456	74.456		50mg+AB	13.23	0.037594	a	0.534749	53.4749
	100mg	9.8496	0.075188	g		0		100mg	6.0564	0.160425	h		0
	100mg+A	25.038	0.455803	a	1.54203	154.203		100mg+A	10.365	0.137822	b	0.711413	71.1413
	100mg+B	24.474	0.567657	a	1.48477	148.477		100mg+B	9.5902	0.291299	de	0.583482	58.3482
	100mg+AB	21.805	0.327737	b	1.2138	121.38		100mg+AB	9.6992	0.293233	cd	0.601479	60.1479
	200mg	8.5752	0.0652231	g		0		200mg	5.0865	0.326354	i		0
	200mg+A	13.383	0.163868	e	0.560663	56.0663		200mg+A	9.2406	0.136637	def	0.816691	81.6691
	200mg+B	12.447	0.7139	f	0.451511	45.1511		200mg+B	9.0564	0.244245	fg	0.780478	78.0478
	200mg +AB	11.395	0.340988	f	0.328832	32.8832		200mg +AB	9.1316	0.0814151	efg	0.795262	79.5262

## Sheet: SOD
	SHOOT						ROOT
	Control	14.5284	0.889659	ef	FOLD	PERCENTAGE		Control	16.7679	0.461364	f	FOLD	PERCENTAGE
	A	20.7856	0.784047	c	0.430681	43.0681		A	21.5663	0.505462	e	0.286166	28.6166
	B	18.4983	0.866624	cd	0.273249	27.3249		B	22.3814	1.02157	e	0.334774	33.4774
	AB	18.986	0.199334	cd	0.306816	30.6816		AB	19.931	0.927146	e	0.18864	18.864
	50mg	13.0223	1.18049	fg		0		50mg	21.768	0.439346	e		0
	50mg+A	21.1264	0.808621	c	0.622325	62.2325		50mg+A	32.2731	0.757094	c	0.482595	48.2595
	50mg+B	27.5146	1.12327	a	1.11288	111.288		50mg+B	47.3022	1.95044	a	1.17302	117.302
	50mg+AB	23.8214	1.24086	b	0.829278	82.9278		50mg+AB	40.1638	1.13265	b	0.845083	84.5083
	100mg	6.03871	0.766388	h		0		100mg	12.8955	0.206892	g		0
	100mg+A	23.7478	0.665867	b	2.93259	293.259		100mg+A	25.7344	1.31898	d	0.995604	99.5604
	100mg+B	25.5408	0.786595	ab	3.22952	322.952		100mg+B	22.3437	2.44839	e	0.732667	73.2667
	100mg+AB	26.1382	0.79844	ab	3.32844	332.844		100mg+AB	34.8853	0.565551	c	1.70523	170.523
	200mg	5.66078	0.0797372	h		0		200mg	9.28991	0.214713	h		0
	200mg+A	15.9806	0.435727	e	1.82304	182.304		200mg+A	16.284	0.164966	f	0.752873	75.2873
	200mg+B	15.9257	0.180322	e	1.81333	181.333		200mg+B	14.0692	0.246261	g	0.514462	51.4462
	200mg +AB	11.509	1.26148	g	1.03311	103.311		200mg +AB	13.1764	0.173071	g	0.418351	41.8351

## Sheet: APX
	shoot								ROOT
	Control	0.56	0.0246937	j	FOLD	PERCENTAGE			Control	0.9497	0.0246937	d	FOLD	PERCENTAGE
	A	2.1163	0.0291433	d	2.77911	277.911			A	1.855	0.0291433	a	0.953248	95.3248
	B	1.9017	0.0666942	f	2.39589	239.589			B	1.5213	0.0666942	b	0.601874	60.1874
	AB	2.0043	0.0185203	ef	2.57911	257.911			AB	1.141	0.0185203	c	0.201432	20.1432
	50mg	1.5937	0.0101708	g		0			50mg	0.4737	0.0101708	g		0
	50mg+A	3.0427	0.0236807	b	0.909205	90.9205			50mg+A	0.9333	0.0236807	d	0.970234	97.0234
	50mg+B	2.191	0.0269093	d	0.374788	37.4788			50mg+B	0.9987	0.0269093	d	1.1083	110.83
	50mg+AB	3.248	0.0690604	a	1.03802	103.802			50mg+AB	1.533	0.0690604	b	2.23623	223.623
	100mg	1.1667	0.0275096	h		0			100mg	0.4993	0.0275096	g		0
	100mg+A	2.926	0.0269093	b	1.50793	150.793			100mg+A	0.5997	0.0269093	f	0.201082	20.1082
	100mg+B	2.954	0.0229807	b	1.53193	153.193			100mg+B	0.8213	0.0229807	e	0.644903	64.4903
	100mg+AB	2.947	0.0242487	b	1.52593	152.593			100mg+AB	1.001	0.0242487	d	1.00481	100.481
	200mg	0.791	0.0106927	i		0			200mg	0.322	0.0106927	h		0
	200mg+A	2.3707	0.0308671	c	1.99709	199.709			200mg+A	0.8027	0.0163333	e	1.49286	149.286
	200mg+B	2.2073	0.0262953	cd	1.79052	179.052			200mg+B	0.7583	0.0203415	e	1.35497	135.497
	200mg +AB	2.2797	0.0262953	cd	1.88205	188.205			200mg +AB	0.637	0.0323316	f	0.978261	97.8261

## Sheet: MDA
	SHOOT							ROOT
	Control	3.95699	0.0860215	h				Control	2.6667	0.310155	ghi
	A	3.74194	0.0744968	hi	-0.0543478	-5.43478		A	2.3226	0.129032	ij	-0.129036	-12.9036
	B	2.19355	0.0744968	k	-0.445652	-44.5652		B	2.4946	0.0860215	hi	-0.0645367	-6.45367
	AB	3.26882	0.0430108	j	-0.173913	-17.3913		AB	1.8925	0.0430108	j	-0.290321	-29.0321
	50mg	7.69892	0.113796	d		0		50mg	9.2473	0.301075	c		0
	50mg+A	3.6129	0.0744968	i	-0.530726	-53.0726		50mg+A	2.1505	0.113796	ij	-0.767446	-76.7446
	50mg+B	2.4086	0.155077	k	-0.687151	-68.7151		50mg+B	3.0538	0.172043	g	-0.669763	-66.9763
	50mg+AB	3.69892	0.0430108	hi	-0.519553	-51.9553		50mg+AB	3.0108	0.113796	gh	-0.674413	-67.4413
	100mg	9.41935	0.0744968	b		0		100mg	15.14	0.335925	b		0
	100mg+A	3.6129	0.148994	i	-0.616438	-61.6438		100mg+A	6.6237	0.155077	d	-0.562503	-56.2503
	100mg+B	4.60215	0.239474	g	-0.511416	-51.1416		100mg+B	5.4624	0.239474	e	-0.639207	-63.9207
	100mg+AB	3.52688	0.113796	ij	-0.625571	-62.5571		100mg+AB	5.2903	0.0744968	e	-0.650575	-65.0575
	200mg	14.6344	0.0860215	a		0		200mg	17.763	0.0860215	a		0
	200mg+A	7.77419	0.0744968	d	-0.468773	-46.8773		200mg+A	8.6667	0.155077	de	-0.512093	-51.2093
	200mg+B	7.13978	0.155077	e	-0.512123	-51.2123		200mg+B	9.2043	0.113796	d	-0.481827	-48.1827
	200mg +AB	6.66667	0.113796	f	-0.544453	-54.4453		200mg +AB	7.0172	0.0430108	f	-0.604954	-60.4954

## Sheet: proline 
	Control	30.114	0.31114	h	fold	percentage
	A	27.636	0.42401	h	-0.0822873	-8.22873
	B	23.873	0.20369	h	-0.207246	-20.7246
	AB	21.168	0.65477	i	-0.297071	-29.7071
	50ppm	97.49	1.43067	c		0
	50ppm +A	45.746	1.83697	fg	-0.530762	-53.0762
	50ppm +B	45.881	1.04525	fg	-0.529377	-52.9377
	50ppm +AB	40.337	0.73441	fg	-0.586245	-58.6245
	100ppm	124.66	3.1114	b		0
	100ppm +A	61.152	3.1114	e	-0.50945	-50.945
	100ppm +B	51.038	0.71533	f	-0.590582	-59.0582
	100ppm +AB	48.804	0.8232	f	-0.608503	-60.8503
	200ppm	192.86	8.232	a		0
	200ppm +A	68.443	0.88786	d	-0.645116	-64.5116
	200ppm +B	64.562	1.04525	d	-0.665239	-66.5239
	200ppm +AB	61.152	1.13409	e	-0.68292	-68.292

[truncated: 1 more sheets: Heavy metal ]
